# Supplementary material for: Potentially Beneficial Effects on Healthy Aging by Supplementation of the EPA-Rich Microalgae Phaeodactylum tricornutum or Its Supernatant—A Randomized Controlled Pilot Trial in Elderly Individuals
Source: MDPI journal article supplement (doi:10.3390/md20110716), 2022-11-15
Supplement: s1 [file s1]

# Potentially Beneficial Effects on Healthy Aging by Supplementation of the EPA-Rich Microalgae *Phaeodactylum tricornutum* or Its Supernatant—A Randomized Controlled Pilot Trial in Elderly Individuals

Authors: Lena Stiefvatter, Konstantin Frick, Katja Lehnert, Walter Vetter, Alexander Montoya-Arroyo, Jan Frank, Ulrike Schmid-Staiger, and Stephan C. Bischoff

Supplementary Materials

**Table S1.** Food Frequency Questionnaire at the study start

|                  | <i>All</i><br><i>0</i><br>( <i>n</i> = 19) | <i>Comp</i><br><i>0</i><br>( <i>n</i> = 5) | <i>A</i><br><i>0</i><br>( <i>n</i> = 5) | <i>SupB</i><br><i>0</i><br>( <i>n</i> = 5) | <i>A+SupB</i><br><i>0</i><br>( <i>n</i> = 4) |
|------------------|--------------------------------------------|--------------------------------------------|-----------------------------------------|--------------------------------------------|----------------------------------------------|
| <b>FFQ</b>       |                                            |                                            |                                         |                                            |                                              |
| Energy [kcal]    | 1523 ± 348                                 | 1414 ± 311                                 | 1668 ± 363                              | 1498 ± 437                                 | 1510 ± 390                                   |
| Protein [g]      | 64.8 ± 20.4                                | 53.4 ± 9.8                                 | 84.4 ± 23.3                             | 61.6 ± 13.2                                | 58.7 ± 24.9                                  |
| Fat [g]          | 49.8 ± 14.6                                | 46.4 ± 6.4                                 | 47.8 ± 11.3                             | 49.8 ± 17.8                                | 56.7 ± 24.6                                  |
| PUFA [g]         | 7.6 ± 3.2                                  | 6.0 ± 1.2                                  | 7.8 ± 2.7                               | 7.8 ± 3.0                                  | 8.9 ± 5.9                                    |
| Carbohydrates[g] | 179.7 ± 53.9                               | 157.5 ± 54.0                               | 208.7 ± 77.1                            | 178.1 ± 56.4                               | 173.3 ± 9.3                                  |
| Fibre [g]        | 19.2 ± 7.3                                 | 14.3 ± 4.2                                 | 23.6 ± 10.6                             | 20.6 ± 7.7                                 | 18 ± 0.4                                     |
| Carotenoid[mg]   | 3.93 ± 2.1                                 | 3.0 ± 1.0                                  | 4.1 ± 2.0                               | 4.0 ± 2.3                                  | 4.3 ± 2.7                                    |
| Vitamin A [µg]   | 974.6 ± 370                                | 849.7 ± 271                                | 1014.6 ± 390                            | 984.1 ± 390                                | 1069.0 ± 386                                 |
| Vitamin E [µg]   | 7.3 ± 2.4                                  | 5.2 ± 1.0                                  | 8.0 ± 2.6                               | 8.0 ± 2.4                                  | 8.1 ± 2.2                                    |

Values are expressed as mean ± standard deviation (SD) at the study start (time-point 0).  
Abbreviations: FFQ, Food Frequency Questionnaire; PUFA, polyunsaturated fatty acid.

**Table S2.** Laboratory parameter and inflammatory markers

| Blood biomarkers        | All<br>0<br>(n= 19) | All<br>2<br>(n= 19) | Comp<br>2<br>(n= 5) | Comp<br>4<br>(n= 5) | $\Delta$<br>Comp | A<br>2<br>(n= 5) | A<br>4<br>(n= 5) | $\Delta$<br>A | SupB<br>2<br>(n= 5) | SupB<br>4<br>(n= 5) | $\Delta$<br>SupB | A+SupB<br>2<br>(n= 4) | A+SupB<br>4<br>(n= 4) | $\Delta$<br>A+SupB |
|-------------------------|---------------------|---------------------|---------------------|---------------------|------------------|------------------|------------------|---------------|---------------------|---------------------|------------------|-----------------------|-----------------------|--------------------|
| Plasma glucose (%)      | 95.58±16.6          | 94.63±15.9          | 104.6 ± 27.1        | 96.4 ± 17.1         | -8.20±11.3       | 91.8 ± 13.2      | 85.8 ± 5.8#      | -6.00±7.9     | 92.8 ± 8.6          | 89.2 ± 7.6          | -3.60±5.3        | 88.0 ± 6.8            | 86.25 ± 3.3           | -1.75±4.0          |
| HbA1c [%]               | 5.50±0.5            | 5.47±0.5            | 5.68 ± 0.9          | 5.66 ± 0.8          | -0.02±0.5        | 5.48 ± 0.4       | 5.54 ± 0.3       | 1.16±2.3      | 5.4 ± 0.1           | 5.44 ± 0.2          | 1.12±2.3         | 5.3 ± 0.2             | 5.25 ± 0.2            | -0.03±0.0          |
| Cholesterol [mg/dl]     | 4.92±1.3            | 218.26±44.0         | 223.2 ± 46.8        | 223.6 ± 50.9        | 0.40±31.6        | 207.4 ± 29.5     | 209.4 ± 44.1     | 2.00±17.3     | 209.8 ± 59.6        | 206.2 ± 59.1(*)     | -3.60±2.9        | 236.3 ± 51.8          | 238.5 ± 57.3          | 2.25±8.0           |
| Triglycerides [mg/dl]   | 224.58±50.0         | 100.89±56.5         | 130.2 ± 103         | 115.6 ± 46.1        | -14.60±52.5      | 101.8 ± 42.6     | 83.6 ± 21.9      | -18.20±27.7   | 74.6 ± 22.2         | 65.8 ± 17.1*(#)     | -8.80±5.9        | 96 ± 17.6             | 117.5 ± 67.5          | 21.50±44.8         |
| HDL-cholesterol [mg/dl] | 99.89±60.1          | 69.95±17.7          | 67.4 ± 24.5         | 70.6 ± 28.9         | 3.20±9.6         | 65.6 ± 12.3      | 64.2 ± 9.8       | -1.40±4.4     | 71.4 ± 13.6         | 69.8 ± 13.0*        | -1.60±1.0        | 76.75 ± 24.9          | 73.75 ± 23.8          | -3.00±2.2          |
| LDL-cholesterol [mg/dl] | 71.11±18.4          | 130.42±31.3         | 134.8 ± 27.7        | 139.6 ± 30.4        | 4.80±24.8        | 127.4 ± 33.3     | 135.6 ± 45.1     | 8.20±13.3     | 121.6 ± 44.9        | 128 ± 47.1*         | 6.40±4.2         | 139.8 ± 27.0          | 144.5 ± 37.5          | 4.75±9.7           |
| LDL/HDL ratio           | 2.02±0.8            | 2.01±0.7            | 2.22 ± 0.9          | 2.28 ± 1.0          | 0.06±0.3         | 2.04 ± 0.7       | 2.16 ± 0.8       | 0.12±0.2      | 1.76 ± 0.7          | 1.86 ± 0.8*         | 0.10±0.1         | 2.03 ± 0.9            | 2.1 ± 0.9             | 0.08±0.1           |
| TSH [mU/l]              | 2.12±2.9            | 1.86±1.4            | 2.142± 2.3          | 1.14 ± 0.5          | -1.01±2.1        | 1.46± 0.9        | 1.50 ± 1.2       | -0.13±0.2     | 1.52 ± 0.8          | 1.56± 0.8           | 0.05±0.2         | 2.22 ± 1.2            | 2.16 ± 1.04           | -0.07±0.3          |
| Insulin [µE/ml]         | 7.82±4.1            | 7.64±2.2            | 9.06 ± 2.6          | 7.66 ± 1.0          | -1.40±1.7        | 8.18 ± 1.1       | 6.28 ± 2.0*      | -1.90±1.0     | 6.26 ± 2.2          | 5.96 ± 2.0          | -0.30±1.5        | 6.93 ± 2.5            | 6.83 ± 3.1            | -0.10±0.6          |
| HOMA-Index              | 1.95±1.7            | 1.78±0.6            | 2.34 ± 0.8          | 1.78 ± 0.5          | -0.52±0.3        | 1.82 ± 0.3       | 1.28 ± 0.3*      | -0.54±0.3     | 1.46 ± 0.6          | 1.32 ± 0.5          | -0.14±0.4        | 1.45 ± 0.4            | 1.425 ± 0.6           | -0.03±0.2          |

Values are expressed as mean ± SD.  $\Delta$  is the change from week 4 to week 2 as treatment effect. Abbreviations: diets see Figure 2; HbA1c, haemoglobin beta-N-1-deoxy fructosyl component of haemoglobin; HDL, high-density lipoprotein; LDL, low-density lipoprotein; TSH; thyroid-stimulating hormone = thyrotropin; HOMA index, Homeostasis model assessment for insulin resistance. Statistics: \* indicate difference within one group between week two (2) and week four (4) (paired t-test), # indicate difference to week 0 (ANOVA with Tukey post hoc test. (\*, #)  $p < 0.1$

**Table S3.** Mobility markers and body composition at study start and the study change

| Parameters             | 0              |   |      | $\Delta$       |   |     |             |   |                |      |   |                  |      |   |        |
|------------------------|----------------|---|------|----------------|---|-----|-------------|---|----------------|------|---|------------------|------|---|--------|
|                        | All<br>(n= 19) |   |      | Comp<br>(n= 5) |   |     | A<br>(n= 5) |   | SupB<br>(n= 5) |      |   | A+SupB<br>(n= 4) |      |   |        |
| WOMAC                  | 9.2            | ± | 10.4 | 4.3            | ± | 8.7 | -1.25       | ± | 1.9            | 4.5  | ± | 8.4              | 1.0  | ± | 2.0    |
| Gait speed [m/s]       | 4.4            | ± | 0.7  | 0.2            | ± | 0.4 | -0.2        | ± | 0.3            | -0.1 | ± | 0.4              | -0.5 | ± | 0.6(*) |
| 5-STs                  | 10.4           | ± | 3.1  | 0.7            | ± | 0.3 | -0.7        | ± | 1.2*           | 0.1  | ± | 0.5(*)           | 1.0  | ± | 0.8    |
| Handgrip strength [kg] | 30.4           | ± | 11.2 | -2.6           | ± | 5.8 | 1.0         | ± | 2.1            | -1.5 | ± | 2                | -0.7 | ± | 1.6    |
| Body fat mass [%]      | 26.2           | ± | 7.3  | -0.2           | ± | 0.6 | -0.2        | ± | 0.4            | -0.8 | ± | 0.5              | -1.2 | ± | 1.1    |
| Body cell mass [kg]    | 24.2           | ± | 9.3  | 0.5            | ± | 0.8 | 0.5         | ± | 0.6            | 0.1  | ± | 0.8              | 0.3  | ± | 0.5    |
| Lean body mass [kg]    | 51.1           | ± | 10.6 | 1.2            | ± | 1.1 | -0.5        | ± | 1.3(*)         | -0.3 | ± | 0.6*             | -0.2 | ± | 0.7(*) |
| ASM [kg]               | 18.17          | ± | 4.3  | -0.8           | ± | 1.3 | -0.3        | ± | 0.9            | -1.0 | ± | 1.5              | -0.4 | ± | 0.9    |
| ASMI [kg/m²]           | 6.3            | ± | 0.8  | -0.2           | ± | 0.2 | -0.1        | ± | 0.3            | -0.4 | ± | 0.5              | -0.1 | ± | 0.2    |

The body cell mass is defined as the muscle and organ cell mass. The lean body mass is the fat free mass, the body cell mass and the extracellular mass (interstitium, bone, connective tissue). Values are expressed as mean ± SD from 19 participants at study start (0) (All n= 19; Comp, A, SupB each

$n = 5$ ;  $A+SupB$   $n = 4$ ) and  $\Delta$  is the change from week 4 to week 2 as treatment effect. Statistics: \* treatment effect indicate difference to the *Comp* group (t-test) (\*)  $p < 0.1$ , \*  $p < 0.05$ . Abbreviations: diets see Figure 2; WOMAC, Western Ontario and McMaster Universities Arthritis Index; ASM; Appendicular skeletal muscle mass; ASMI, Appendicular skeletal muscle mass index.

**Table S4.** Plasma fatty acid blood composition at different time-points

| FA plasma [%] | All 0<br>( $n = 19$ ) | All 2<br>( $n = 19$ ) | Comp 2<br>( $n = 5$ ) | Comp 4<br>( $n = 5$ ) | $\Delta$ Comp   | A 2<br>( $n = 5$ ) | A 4<br>( $n = 5$ ) | $\Delta$ A                    | SupB 2<br>( $n = 5$ ) | SupB 4<br>( $n = 5$ ) | $\Delta$ SupB    | A+SupB 2<br>( $n = 4$ ) | A+SupB 4<br>( $n = 4$ ) | $\Delta$ A+SupB |
|---------------|-----------------------|-----------------------|-----------------------|-----------------------|-----------------|--------------------|--------------------|-------------------------------|-----------------------|-----------------------|------------------|-------------------------|-------------------------|-----------------|
| MUFA          | 26.5 $\pm$ 3.0        | 26.07 $\pm$ 3.2       | 27.11 $\pm$ 4.7       | 27.65 $\pm$ 4.4       | 0.54 $\pm$ 1.6  | 27.16 $\pm$ 3.9    | 25.71 $\pm$ 2.1    | -1.46 $\pm$ 3.0               | 25.51 $\pm$ 1.7       | 24.31 $\pm$ 3.1       | -1.19 $\pm$ 1.6  | 25.37 $\pm$ 2.4         | 26.38 $\pm$ 2.8         | 1.01 $\pm$ 3.1  |
| PUFA          | 43.53 $\pm$ 4.5       | 43.51 $\pm$ 4.4       | 40.58 $\pm$ 6.3       | 42.51 $\pm$ 4.9       | 1.93 $\pm$ 3.0  | 42.85 $\pm$ 4.2    | 45.30 $\pm$ 3.4    | 2.45 $\pm$ 3.9                | 45.93 $\pm$ 2.2       | 47.01 $\pm$ 3.7       | 1.08 $\pm$ 2.0   | 44.99 $\pm$ 2.5         | 43.14 $\pm$ 5.5         | -1.84 $\pm$ 3.2 |
| n-3           | 6.8 $\pm$ 2.2         | 5.8 $\pm$ 1.3\$       | 4.49 $\pm$ 1.0        | 5.40 $\pm$ 1.0**      | 0.91 $\pm$ 0.4  | 6.24 $\pm$ 1.1     | 6.45 $\pm$ 1.2     | 0.21 $\pm$ 0.6                | 6.47 $\pm$ 1.5        | 6.95 $\pm$ 1.6        | 0.48 $\pm$ 1.0   | 5.81 $\pm$ 0.7          | 6.49 $\pm$ 0.3(*)       | 0.67 $\pm$ 0.5  |
| 18:3 n-3      | 0.93 $\pm$ 0.4        | 1.05 $\pm$ 0.4(\$)    | 0.83 $\pm$ 0.3        | 0.99 $\pm$ 0.2(*)     | 0.16 $\pm$ 0.1  | 0.92 $\pm$ 0.4     | 0.82 $\pm$ 0.4(*)  | -0.10 $\pm$ 0.1 <sup>++</sup> | 1.33 $\pm$ 0.5(#)     | 1.47 $\pm$ 0.4#       | 0.14 $\pm$ 0.3   | 1.14 $\pm$ 0.2          | 1.17 $\pm$ 0.4 (*)      | 0.03 $\pm$ 0.4  |
| EPA, 20:5 n-3 | 1.80 $\pm$ 0.9        | 1.24 $\pm$ 0.5\$\$    | 0.96 $\pm$ 0.3#       | 1.27 $\pm$ 0.6(*)     | 0.31 $\pm$ 0.3  | 1.38 $\pm$ 0.6     | 1.65 $\pm$ 0.6(*)  | 0.27 $\pm$ 0.3                | 1.49 $\pm$ 0.7        | 2.04 $\pm$ 0.9(*)     | 0.55 $\pm$ 0.6   | 1.10 $\pm$ 2.0          | 1.70 $\pm$ 0.3**        | 0.32 $\pm$ 0.6  |
| 22:5 n-3      | 0.77 $\pm$ 0.2        | 0.7 $\pm$ 0.2(\$)     | 0.60 $\pm$ 0.1#       | 0.76 $\pm$ 0.2(*)     | 0.16 $\pm$ 0.1  | 0.78 $\pm$ 0.1     | 0.83 $\pm$ 0.1     | 0.05 $\pm$ 0.1                | 0.79 $\pm$ 0.2        | 0.82 $\pm$ 0.2        | 0.05 $\pm$ 0.2   | 0.63 $\pm$ 0.1          | 0.69 $\pm$ 0.2          | 0.06 $\pm$ 0.1  |
| DHA, 22:6 n-3 | 3.3 $\pm$ 1.2         | 2.76 $\pm$ 0.7\$\$    | 2.10 $\pm$ 0.49#      | 2.38 $\pm$ 0.6(#)     | 0.28 $\pm$ 0.3  | 3.16 $\pm$ 0.9     | 3.15 $\pm$ 0.8     | -0.01 $\pm$ 0.2               | 2.87 $\pm$ 0.6        | 2.62 $\pm$ 0.4(*)     | -0.25 $\pm$ 0.2+ | 2.95 $\pm$ 0.4          | 2.88 $\pm$ 0.3          | -0.07 $\pm$ 0.3 |
| EPA+DHA       | 5.0 $\pm$ 2.0         | 4.0 $\pm$ 1.1\$\$     | 3.06 $\pm$ 0.7#       | 3.65 $\pm$ 0.8*       | 0.59 $\pm$ 0.3  | 4.54 $\pm$ 1.3     | 4.80 $\pm$ 1.3     | 0.26 $\pm$ 0.5                | 4.36 $\pm$ 1.1        | 4.66 $\pm$ 1.1        | 0.30 $\pm$ 0.7   | 4.10 $\pm$ 0.5          | 4.30 $\pm$ 0.5          | 0.25 $\pm$ 0.8  |
| n-6           | 36.8 $\pm$ 4.3        | 37.8 $\pm$ 3.9(\$)    | 36.09 $\pm$ 5.9       | 37.10 $\pm$ 4.2       | 1.01 $\pm$ 3.0  | 36.61 $\pm$ 3.7    | 38.85 $\pm$ 4.1    | 2.24 $\pm$ 3.8                | 39.47 $\pm$ 2.5       | 40.06 $\pm$ 3.6       | 0.59 $\pm$ 1.6   | 39.17 $\pm$ 2.2         | 36.65 $\pm$ 5.2         | -2.52 $\pm$ 3.1 |
| 20:4 n-6      | 8.38 $\pm$ 2.2        | 8.53 $\pm$ 2.2        | 8.09 $\pm$ 1.5        | 8.43 $\pm$ 1.0        | 0.34 $\pm$ 0.9  | 9.66 $\pm$ 3.7     | 10.18 $\pm$ 2.8    | 0.52 $\pm$ 1.0                | 8.11 $\pm$ 1.1        | 8.47 $\pm$ 0.9*       | 0.36 $\pm$ 0.2   | 8.20 $\pm$ 2.0          | 7.60 $\pm$ 2.3          | -0.60 $\pm$ 0.7 |
| n-6:n-3       | 6.03 $\pm$ 2.1        | 7.26 $\pm$ 1.9\$      | 8.32 $\pm$ 2.1#       | 6.97 $\pm$ 0.9 (*)    | -1.35 $\pm$ 1.4 | 7.42 $\pm$ 2.4     | 6.25 $\pm$ 1.6     | 0.28 $\pm$ 0.9(†)             | 6.43 $\pm$ 1.7        | 6.12 $\pm$ 2.0        | -0.31 $\pm$ 0.9  | 6.79 $\pm$ 0.1          | 5.64 $\pm$ 0.6 *        | -1.15 $\pm$ 0.6 |
| AA/EPA        | 5.72 $\pm$ 2.6        | 7.53 $\pm$ 2.3\$\$    | 8.93 $\pm$ 2.5#       | 7.60 $\pm$ 2.7        | -1.32 $\pm$ 3.3 | 7.42 $\pm$ 2.4     | 6.40 $\pm$ 1.3     | -1.02 $\pm$ 2.0               | 6.39 $\pm$ 2.9        | 5.30 $\pm$ 3.4(*)     | -1.10 $\pm$ 1.1  | 7.38 $\pm$ 0.7          | 4.54 $\pm$ 0.8**        | -0.44 $\pm$ 1.4 |

Values are expressed as mean $\pm$ SD.  $\Delta$  is the change from week 4 to week 2 as treatment effect. Abbreviations: FA, fatty acids; n-3 FA, omega-3 fatty acids; n-6 FA, omega-6 fatty acids; SFA, saturated fatty acids; MUFA, monounsaturated fatty acids; PUFA, polyunsaturated fatty acids; n-6: n-3, n-6 FA to n-3 FA ratio; AA/EPA, arachidonic- and eicosapentaenoic acid ratio; EPA, eicosapentaenoic acid; DHA, docosahexaenoic acid. Statistics: \$ indicates difference between study start (week 0) and after the wash out (week 2). \* indicate difference within one group between week two (2) and week four (4) (paired t-test), # indicates difference to All time-point 0 (ANOVA with Tukey post hoc test or Dunnett's). + indicates difference to *Comp*. (\$)/(\*)/(#)/(+)  $p < 0.1$ , \*/#  $p < 0.05$ , \$\$/+/\*\*  $p < 0.01$ .

**Table S5.** Carotenoid plasma levels at the study start, after two- weeks and four weeks of intervention

| Parameter [ $\mu\text{M}$ ] | <i>All</i><br>0<br>( <i>n</i> = 19) | <i>Comp</i><br>2<br>( <i>n</i> = 5) | <i>Comp</i><br>4<br>( <i>n</i> = 5) | <i>A</i><br>2<br>( <i>n</i> = 5) | <i>A</i><br>4<br>( <i>n</i> = 5) | <i>SupB</i><br>2<br>( <i>n</i> = 5) | <i>SupB</i><br>4<br>( <i>n</i> = 5) | <i>A+SupB</i><br>2<br>( <i>n</i> = 4) | <i>A+SupB</i><br>4<br>( <i>n</i> = 4) |
|-----------------------------|-------------------------------------|-------------------------------------|-------------------------------------|----------------------------------|----------------------------------|-------------------------------------|-------------------------------------|---------------------------------------|---------------------------------------|
| Lutein                      | 0.21 $\pm$ 0.06                     | 0.26 $\pm$ 0.09                     | 0.25 $\pm$ 0.12                     | 0.17 $\pm$ 0.04                  | 0.14 $\pm$ 0.08                  | 0.18 $\pm$ 0.08                     | 0.23 $\pm$ 0.13                     | 0.2 $\pm$ 0.06                        | 0.16 $\pm$ 0.07                       |
| $\beta$ -Cryptoxanthin      | 0.13 $\pm$ 0.08                     | 0.15 $\pm$ 0.13                     | 0.11 $\pm$ 0.06                     | 0.11 $\pm$ 0.06                  | 0.1 $\pm$ 0.07                   | 0.08 $\pm$ 0.03                     | 0.1 $\pm$ 0.02*                     | 0.11 $\pm$ 0.04                       | 0.13 $\pm$ 0.01                       |
| Lycopene                    | 0.53 $\pm$ 0.25                     | 0.51 $\pm$ 0.23                     | 0.42 $\pm$ 0.15                     | 0.61 $\pm$ 0.2                   | 0.57 $\pm$ 0.26                  | 0.56 $\pm$ 0.43                     | 0.47 $\pm$ 0.21                     | 0.65 $\pm$ 0.28                       | 0.62 $\pm$ 0.26                       |
| $\alpha$ -carotene          | 0.16 $\pm$ 0.14                     | 0.19 $\pm$ 0.11                     | 0.2 $\pm$ 0.17                      | 0.18 $\pm$ 0.11                  | 0.13 $\pm$ 0.08                  | 0.21 $\pm$ 0.21                     | 0.22 $\pm$ 0.1                      | 0.10 $\pm$ 0.07#                      | 0.13 $\pm$ 0.08*                      |
| Retinol                     | 0.95 $\pm$ 0.33                     | 0.93 $\pm$ 0.31                     | 1.12 $\pm$ 0.23                     | 0.94 $\pm$ 0.2                   | 0.87 $\pm$ 0.15                  | 0.73 $\pm$ 0.35                     | 0.82 $\pm$ 0.1                      | 0.72 $\pm$ 0.17#                      | 0.81 $\pm$ 0.2                        |
| $\gamma$ -Tocopherol        | 0.16 $\pm$ 0.06                     | 0.18 $\pm$ 0.01                     | 0.19 $\pm$ 0.04                     | 0.16 $\pm$ 0.05                  | 0.14 $\pm$ 0.04                  | 0.15 $\pm$ 0.03                     | 0.15 $\pm$ 0.02                     | 0.15 $\pm$ 0.03                       | 0.12 $\pm$ 0.01(*)                    |
| $\alpha$ -Tocopherol        | 23.63 $\pm$ 6.16                    | 25.4 $\pm$ 8.03                     | 24.55 $\pm$ 1.62                    | 22.19 $\pm$ 4.35                 | 21.47 $\pm$ 3.87                 | 19.69 $\pm$<br>7.44###              | 20.54 $\pm$ 5##                     | 20.4 $\pm$ 1.31                       | 21.02 $\pm$ 2.46                      |

Values are expressed in  $\mu\text{M}$  as mean  $\pm$  SD (*n*= 19). Statistics: \* indicate differences within one group between week two (2), after the wash-out and week four after two weeks intervention (4). # Indicates the difference between week 4 of different groups. \*/#  $p < 0.05$ , ##  $p < 0.01$ , ###  $p < 0.001$ . Abbreviations: diets see Figure 2.

**Table S6.** The concentration of short-chain fatty acids (SCFA) per dry mass in fecal samples at week 2 and week 4 after the intervention within the four study groups

| Fecal SCFA [ $\mu\text{mol/g}$ ] DM | <i>Comp</i><br>2<br>( <i>n</i> = 5) | <i>Comp</i><br>4<br>( <i>n</i> = 5) | <i>A</i><br>2<br>( <i>n</i> = 5) | <i>A</i><br>4<br>( <i>n</i> = 5) | <i>SupB</i><br>2<br>( <i>n</i> = 5) | <i>SupB</i><br>4<br>( <i>n</i> = 5) | <i>A+SupB</i><br>2<br>( <i>n</i> = 5) | <i>A+SupB</i><br>4<br>( <i>n</i> = 4) |
|-------------------------------------|-------------------------------------|-------------------------------------|----------------------------------|----------------------------------|-------------------------------------|-------------------------------------|---------------------------------------|---------------------------------------|
| Acetat                              | 316.1 $\pm$ 133.3                   | 323.0 $\pm$ 159.9                   | 191.3 $\pm$ 82.6                 | 205.4 $\pm$ 140.2                | 218.6 $\pm$ 105.7                   | 258.8 $\pm$ 210.5                   | 158.1 $\pm$ 42.8                      | 128.4 $\pm$ 31.0                      |
| Propionat                           | 100.5 $\pm$ 86.4                    | 66.2 $\pm$ 32.5                     | 34.9 $\pm$ 23.5                  | 34.3 $\pm$ 28.2                  | 45.3 $\pm$ 15.9                     | 44.1 $\pm$ 22.3                     | 35.4 $\pm$ 15.9                       | 29.4 $\pm$ 8.7                        |
| Butyrat                             | 46.6 $\pm$ 23.7                     | 67.4 $\pm$ 38.8                     | 30.7 $\pm$ 21.1                  | 44.5 $\pm$ 41.9                  | 39.0 $\pm$ 22.3                     | 56.8 $\pm$ 55.5                     | 25.4 $\pm$ 14.9                       | 18.8 $\pm$ 7.3                        |
| Iso-butyric acid                    | 46.6 $\pm$ 23.9                     | 67.4 $\pm$ 38.8                     | 30.7 $\pm$ 21.1                  | 44.5 $\pm$ 41.9                  | 39.0 $\pm$ 22.3                     | 56.8 $\pm$ 55.5                     | 25.4 $\pm$ 14.9                       | 18.8 $\pm$ 7.3                        |
| Iso-valeric acid                    | 6.7 $\pm$ 3.0                       | 5.6 $\pm$ 2.3                       | 6.3 $\pm$ 4.3                    | 5.6 $\pm$ 3.0                    | 8.3 $\pm$ 2.4                       | 6.6 $\pm$ 1.8                       | 8.9 $\pm$ 1.7                         | 7.7 $\pm$ 1.9                         |
| Valeric acid                        | 6.4 $\pm$ 3.0                       | 6.8 $\pm$ 3.1                       | 4.1 $\pm$ 3.0                    | 4.0 $\pm$ 3.1                    | 6.0 $\pm$ 2.6                       | 5.0 $\pm$ 2.3                       | 5.2 $\pm$ 1.8                         | 4.2 $\pm$ 1.4                         |
| Iso-caproic acid                    | 0.6 $\pm$ 0.2                       | 0.4 $\pm$ 0.1*                      | 0.6 $\pm$ 0.3                    | 0.4 $\pm$ 0.3                    | 0.6 $\pm$ 0.2                       | 0.5 $\pm$ 0.3                       | 0.6 $\pm$ 0.3                         | 0.4 $\pm$ 0.3                         |
| Hexanoic acid                       | 2.1 $\pm$ 1.7                       | 4.3 $\pm$ 2.8                       | 2.8 $\pm$ 3.1                    | 3.2 $\pm$ 2.6                    | 3.9 $\pm$ 3.9                       | 4.1 $\pm$ 4.5                       | 1.9 $\pm$ 1.2                         | 1.4 $\pm$ 0.6                         |
| Heptanoic acid                      | 0.7 $\pm$ 0.6                       | 0.5 $\pm$ 0.3                       | 0.4 $\pm$ 0.2                    | 0.3 $\pm$ 0.1                    | 0.4 $\pm$ 0.2                       | 0.6 $\pm$ 0.4                       | 0.6 $\pm$ 0.4                         | 0.3 $\pm$ 0.2(*)                      |

Values are expressed as mean  $\pm$  SD. Abbreviation: DM, dry mass. Statistics: \* indicate difference within one group between week two (2), after the wash-out and week four after two weeks intervention (4) (paired t-test). (\*)/  $p < 0.1$ , \*  $p < 0.05$ .

**Table S7.** Nutrient composition of *Comp*, *A*, *SupB* and *A+SupB* diets used in the study

| Fatty acids [mg/g]         | <i>Comp</i> |          |             | <i>A*</i>    |          |             | <i>SupB*</i> |          |             | <i>A+SupB*</i> |          |            |
|----------------------------|-------------|----------|-------------|--------------|----------|-------------|--------------|----------|-------------|----------------|----------|------------|
| 14:0                       | 0.06        | ±        | 0.01        | 11.7         | ±        | 1.08        | 0.56         | ±        | 0.02        | 12.16          | ±        | 1.10       |
| 15:0                       | 0.01        | ±        | 0.00        | 0.9          | ±        | 0.11        | 0.03         | ±        | 0.00        | 0.94           | ±        | 0.11       |
| 16:0                       | 2.40        | ±        | 0.06        | 23.9         | ±        | 1.87        | 3.79         | ±        | 0.08        | 25.34          | ±        | 1.88       |
| 17:0                       | 0.02        | ±        | 0.00        | 0.5          | ±        | 0.06        | 0.02         | ±        | 0.00        | 0.46           | ±        | 0.06       |
| 18:0                       | 0.32        | ±        | 0.02        | 0.8          | ±        | 0.06        | 0.37         | ±        | 0.02        | 0.81           | ±        | 0.06       |
| 22:0                       | 0.02        | ±        | 0.00        | 0.1          | ±        | 0.00        | 0.02         | ±        | 0.00        | 0.10           | ±        | 0.00       |
| 24:0                       | 0.02        | ±        | 0.00        | 2.9          | ±        | 0.01        | 0.08         | ±        | 0.01        | 2.94           | ±        | 0.01       |
| 16:1                       | 0.01        | ±        | 0.01        | 1.3          | ±        | 0.25        | 0.03         | ±        | 0.01        | 1.34           | ±        | 0.25       |
| 16:1 n-7                   | 0.03        | ±        | 0.01        | 39.1         | ±        | 0.16        | 1.86         | ±        | 0.06        | 40.97          | ±        | 0.21       |
| 18:1 n-9 c                 | 2.79        | ±        | 0.03        | 4.8          | ±        | 3.59        | 3.07         | ±        | 0.05        | 5.06           | ±        | 3.61       |
| 18:1                       | 0.08        | ±        | 0.00        | 1.0          | ±        | 0.31        | 0.11         | ±        | 0.00        | 1.06           | ±        | 0.31       |
| 24:1 n-9                   | 0.00        | ±        | 0.00        | 0.4          | ±        | 0.12        | 0.01         | ±        | 0.00        | 0.40           | ±        | 0.12       |
| 16:2                       | 0.00        | ±        | 0.00        | 2.0          | ±        | 0.21        | 0.01         | ±        | 0.00        | 2.01           | ±        | 0.22       |
| 16:2 n-6                   | 0.00        | ±        | 0.00        | 18.2         | ±        | 0.12        | 0.08         | ±        | 0.01        | 18.31          | ±        | 0.13       |
| 16:3                       | 0.00        | ±        | 0.00        | 22.9         | ±        | 0.02        | 0.13         | ±        | 0.01        | 23.06          | ±        | 0.03       |
| 17:2                       | 0.00        | ±        | 0.00        | 0.6          | ±        | 0.18        | 0.00         | ±        | 0.00        | 0.57           | ±        | 0.18       |
| 16:4                       | 0.00        | ±        | 0.00        | 2.2          | ±        | 1.71        | 0.05         | ±        | 0.01        | 2.22           | ±        | 1.71       |
| 18:2 n-6                   | 3.99        | ±        | 0.02        | 12.4         | ±        | 2.46        | 4.17         | ±        | 0.03        | 12.63          | ±        | 2.48       |
| 18:3 n-6                   | 0.00        | ±        | 0.00        | 1.7          | ±        | 0.06        | 0.03         | ±        | 0.00        | 1.70           | ±        | 0.06       |
| 18:3 n-3                   | 0.24        | ±        | 0.01        | 1.7          | ±        | 0.22        | 0.26         | ±        | 0.01        | 1.70           | ±        | 0.23       |
| 18:4 n-?                   | 0.00        | ±        | 0.00        | 0.6          | ±        | 0.76        | 0.00         | ±        | 0.00        | 0.62           | ±        | 0.76       |
| 18:4 n-3                   | 0.00        | ±        | 0.00        | 0.7          | ±        | 0.15        | 0.00         | ±        | 0.01        | 0.72           | ±        | 0.16       |
| 20:3 n-6                   | 0.00        | ±        | 0.00        | 3.0          | ±        | 0.12        | 0.00         | ±        | 0.00        | 3.00           | ±        | 0.12       |
| 20:3 n-3                   | 0.00        | ±        | 0.00        | 0.0          | ±        | 0.11        | 0.12         | ±        | 0.01        | 0.12           | ±        | 0.12       |
| 20:4 n-6                   | 0.00        | ±        | 0.00        | 12.2         | ±        | 0.10        | 0.00         | ±        | 0.00        | 12.25          | ±        | 0.10       |
| PUFA n-3                   | 0.00        | ±        | 0.00        | 2.9          | ±        | 0.17        | 0.02         | ±        | 0.00        | 2.92           | ±        | 0.17       |
| PUFA n-3                   | 0.00        | ±        | 0.00        | 0.7          | ±        | 0.26        | 0.00         | ±        | 0.00        | 0.66           | ±        | 0.26       |
| 20:5 n-3                   | 0.02        | ±        | 0.00        | 125.5        | ±        | 0.00        | 0.63         | ±        | 0.07        | 126.07         | ±        | 0.07       |
| 22:5 n-3                   | 0.00        | ±        | 0.00        | 2.3          | ±        | 1.04        | 0.00         | ±        | 0.00        | 2.34           | ±        | 1.04       |
| 22:6 n-3                   | 0.00        | ±        | 0.01        | 2.2          | ±        | 0.84        | 0.04         | ±        | 0.01        | 2.26           | ±        | 0.85       |
| <b>Mean</b>                | <b>10.0</b> | <b>±</b> | <b>0.04</b> | <b>299.3</b> | <b>±</b> | <b>2.08</b> | <b>15.5</b>  | <b>±</b> | <b>0.04</b> | <b>304.8</b>   | <b>±</b> | <b>1.1</b> |
| Σ n-3 PUFA                 | 0.26        | ±        | 0.02        | 135.99       | ±        | 2.79        | 1.07         | ±        | 0.11        | 136.80         | ±        | 2.89       |
| Σ n-6 PUFA                 | 3.99        | ±        | 0.02        | 29.37        | ±        | 2.74        | 4.21         | ±        | 0.04        | 29.58          | ±        | 2.76       |
| Σ SFA                      | 2.84        | ±        | 0.09        | 40.74        | ±        | 3.19        | 4.87         | ±        | 0.13        | 42.77          | ±        | 3.22       |
| Σ MUFA                     | 2.92        | ±        | 0.05        | 46.65        | ±        | 4.42        | 5.09         | ±        | 0.12        | 48.82          | ±        | 4.50       |
| Σ PUFA                     | 4.25        | ±        | 0.03        | 211.88       | ±        | 8.54        | 5.54         | ±        | 0.18        | 213.17         | ±        | 8.68       |
| n-6:n-3 ratio              | 15.38       | ±        | 0.95        | 0.22         | ±        | 0.98        | 3.94         | ±        | 0.34        | 0.22           | ±        | 0.96       |
| AA/EPA ratio               | 0.00        | ±        | 0.00        | 0.10         | ±        | 39.29       | 0.00         | ±        | 0.00        | 0.10           | ±        | 1.49       |
| EPA+DHA                    | 0.02        | ±        | 0.01        | 127.68       | ±        | 0.84        | 0.67         | ±        | 0.08        | 128.33         | ±        | 0.91       |
| β-Glucan [mg/g]            | 0.0         | ±        | 0           | 0.1          | ±        | 0           | 0.3          | ±        | 0           | 0.38           | ±        | 0          |
| <b>Carotenoids [mg/Kg]</b> |             |          |             |              |          |             |              |          |             |                |          |            |
| Fucoxanthin                | 0           | ±        | 0           | 9298.1       | ±        | 4456.9      | 123.7        | ±        | 0           | 9421.8         | ±        | 4456.9     |
| β-carotene                 | 5.0         | ±        | 0.13        | 129.7        | ±        | 32.89       | 10.01        | ±        | 0.93        | 134.79         | ±        | 33.69      |
| α-carotene                 | 3.49        |          | 0.11        | 3.49         |          | 0.11        | 3.5          |          | 0.13        | 3.5            |          | 0.13       |

|                           |      |   |      |       |   |       |       |   |      |       |   |       |
|---------------------------|------|---|------|-------|---|-------|-------|---|------|-------|---|-------|
| Lycopene                  | 4.29 | ± | 0.14 | 94    | ± | 13.06 | 7.82  | ± | 0.5  | 97.53 | ± | 13.42 |
| Lutein                    | 1.67 | ± | 0.05 | 1.67  | ± | 0.05  | 1.67  | ± | 0.05 | 1.67  | ± | 0.05  |
| Zeaxanthin                | 0    | ± | 0    | 1.64  | ± | 0.51  | 0     | ± | 0    | 1.64  | ± | 0.51  |
| β-Cryptoxanthin           | 0.06 | ± | 0.01 | 1.1   | ± | 0.15  | 0.12  | ± | 0.02 | 1.16  | ± | 0.16  |
| <b>Tocopherol [mg/Kg]</b> |      |   |      |       |   |       |       |   |      |       |   |       |
| α-Tocopherol              | 7.54 | ± | 0.67 | 52.12 | ± | 3.48  | 23.99 | ± | 1.72 | 68.57 | ± | 4.53  |
| β-Tocopherol              | 0.23 | ± | 0.03 | 0.23  | ± | 0.03  | 0.23  | ± | 0.03 | 0.23  | ± | 0.03  |
| γ-Tocopherol              | 3.79 | ± | 0.12 | 4.44  | ± | 0.28  | 3.79  | ± | 0.12 | 4.44  | ± | 0.28  |
| δ-Tocopherol              | 0.13 | ± | 0.01 | 0.13  | ± | 0.01  | 0.13  | ± | 0.01 | 0.13  | ± | 0.01  |
| α-Tocotrienol             | 0    | ± | 0    | 0     | ± | 0     | 0     | ± | 0    | 0     | ± | 0     |
| β-Tocotrienol             | 0    | ± | 0    | 0     | ± | 0     | 0     | ± | 0    | 0     | ± | 0     |
| γ-Tocotrienol             | 0    | ± | 0    | 0.53  | ± | 0.14  | 0     | ± | 0    | 0.53  | ± | 0.14  |

\*with the vegetable bouillon powder
